# Supplementary material
Source: PubMed Central journal article supplement (PMC4331594)
Supplement: mmc1.pdf [file mmc1.pdf]

# THE LANCET Psychiatry

## Supplementary appendix

This appendix formed part of the original submission and has been peer reviewed. We post it as supplied by the authors.

Supplement to: Fazel S, Wolf A, Palm C, Lichtenstein P. Violent crime, suicide, and premature mortality in patients with schizophrenia and related disorders: a 38-year total population study in Sweden. *Lancet Psychiatry* 2014; **1**: 44–54.

**Appendix table 1: Descriptive data for risk factors for unaffected siblings**

|                                           | <b>Men<br/>(n=13,577)</b> | <b>Women<br/>(n=12,780)</b> |
|-------------------------------------------|---------------------------|-----------------------------|
| <b>SOCIOECONOMIC FACTORS</b>              |                           |                             |
| Income in lowest tertile                  | 3,109 (22.9%)             | 3,262 (25.5%)               |
| Born abroad                               | 1,599 (11.8%)             | 1,581 (12.4%)               |
| <b>PARENTAL FACTORS BEFORE MATCHING</b>   |                           |                             |
| Alcohol or drug use disorders             | 300 (2.2%)                | 295 (2.3%)                  |
| Any offence                               | 663 (4.9%)                | 672 (5.3%)                  |
| Violent offence                           | 246 (1.8%)                | 243 (1.9%)                  |
| Suicide                                   | 255 (1.9%)                | 225 (1.8%)                  |
| Psychiatric diagnosis                     | 801 (5.9%)                | 810 (6.3%)                  |
| Born abroad                               | 2,521 (18.6%)             | 2,458 (19.2%)               |
| <b>INDIVIDUAL FACTORS BEFORE MATCHING</b> |                           |                             |
| Alcohol use disorders                     | 345 (2.5%)                | 144 (1.1%)                  |
| Drug use disorders                        | 214 (1.6%)                | 106 (0.8%)                  |
| Alcohol offence                           | 1,207 (8.9%)              | 115 (0.9%)                  |
| Drug offence                              | 759 (5.6%)                | 151 (1.2%)                  |
| Alcohol or drug medication                | 24 (0.2%)                 | 7 (0.1%)                    |
| Any offence                               | 3,949 (29.1%)             | 1,059 (8.3%)                |
| Violent offence                           | 1,344 (9.9%)              | 167 (1.3%)                  |
| Non-violent offence                       | 3,703 (27.3%)             | 998 (7.8%)                  |
| Self-harm                                 | 266 (2.0%)                | 422 (3.3%)                  |
| IQ* – high (7-9)                          | 2,291 (21.9%)             | NA                          |
| - medium (4-6)                            | 5,224 (38.5%)             | NA                          |
| - low (1-3)                               | 2,945 (21.7%)             | NA                          |
| Birth complications                       | 282 (9.3%)                | 238 (8.4%)                  |

Data are n (%), unless otherwise indicated. IQ=intelligence quotient. NA=not available. Data for birth complications were available for a sample of 10,540 men and 9,948 women. \*IQ data were available for 10,460 men.

**Appendix table 2: Descriptive data for risk factors for general population controls**

|                                           | <b>Men<br/>(n=292,420)</b> | <b>Women<br/>(n=193,520)</b> |
|-------------------------------------------|----------------------------|------------------------------|
| <b>SOCIOECONOMIC FACTORS</b>              |                            |                              |
| Income in lowest tertile                  | 82,900 (28.3%)             | 58,471 (30.2%)               |
| Born abroad                               | 53,806 (18.4%)             | 35,626 (18.4%)               |
| Single                                    | 174,325 (59.6%)            | 96,145 (49.7%)               |
| <b>PARENTAL FACTORS BEFORE MATCHING</b>   |                            |                              |
| Alcohol or drug use disorders             | 9,744 (3.3%)               | 6,579 (3.4%)                 |
| Any offence                               | 13,536 (4.6%)              | 8,931 (4.6%)                 |
| Violent offence                           | 3,975 (1.4%)               | 2,574 (1.3%)                 |
| Suicide                                   | 3,138 (1.1%)               | 2,180 (1.1%)                 |
| Psychiatric diagnosis                     | 12,996 (4.4%)              | 8,871 (4.6%)                 |
| Born abroad                               | 21,104 (7.2%)              | 13,797 (7.1%)                |
| <b>INDIVIDUAL FACTORS BEFORE MATCHING</b> |                            |                              |
| Alcohol use disorders                     | 2,834 (1.0%)               | 1,156 (0.6%)                 |
| Drug use disorders                        | 1,570 (0.5%)               | 755 (0.4%)                   |
| Alcohol offence                           | 2,809 (1.0%)               | 289 (0.1%)                   |
| Drug offence                              | 2,670 (0.9%)               | 469 (0.2%)                   |
| Alcohol or drug medication                | 242 (0.1%)                 | 78 (0.04%)                   |
| Any offence                               | 54,633 (18.7%)             | 9,644 (5.0%)                 |
| Violent offence                           | 14,452 (4.9%)              | 1,090 (0.6%)                 |
| Non-violent offence                       | 50,775 (17.4%)             | 9,159 (4.7%)                 |
| Self-harm                                 | 3,133 (1.1%)               | 3,071 (1.6%)                 |
| IQ* – high (7-9)                          | 49,682 (17.0%)             | ---                          |
| - medium (4-6)                            | 113,339 (54.9%)            | ---                          |
| - low (1-3)                               | 43,455 (21.0%)             | ---                          |
| Birth complications                       | 6,365 (8.3%)               | 3,781 (8.5%)                 |

Data are n (%), unless otherwise indicated. IQ=intelligence quotient. NA=not available. Data on birth complications were available for a sample of 76,427 men and 44,418 women. \*IQ data were available for 206,476 men.

**Appendix table 3: Risk factors for violent offence in patients with schizophrenia and related disorders, unaffected siblings, and general population controls**

|                                                     | <b>Schizophrenia and related disorders</b> | <b>Unaffected siblings</b> | <b>General population</b> |
|-----------------------------------------------------|--------------------------------------------|----------------------------|---------------------------|
|                                                     | <b>HR (95% CI)</b>                         | <b>HR (95% CI)</b>         | <b>HR (95% CI)</b>        |
| <b>SOCIOECONOMIC FACTORS</b>                        |                                            |                            |                           |
| <b>Sex</b>                                          |                                            |                            |                           |
| - male                                              | <b>3.3 (3.0-3.6)</b>                       | <b>6.3 (5.3-7.6)</b>       | <b>7.8 (7.2-8.5)</b>      |
|                                                     |                                            |                            |                           |
| <b>Low income</b>                                   |                                            |                            |                           |
| - male                                              | <b>1.4 (1.3-1.5)</b>                       | <b>1.6 (1.4-1.9)</b>       | <b>1.7 (1.7-1.8)</b>      |
| - female                                            | <b>1.4 (1.2-1.7)</b>                       | <b>2.1 (1.5-3.0)</b>       | <b>2.1 (1.8-2.5)</b>      |
|                                                     |                                            |                            |                           |
| <b>Born abroad</b>                                  |                                            |                            |                           |
| - male                                              | <b>1.7 (1.5-1.8)</b>                       | <b>2.4 (2.0-2.8)</b>       | <b>2.1 (2.0-2.2)</b>      |
| - female                                            | <b>1.4 (1.2-1.7)</b>                       | <b>1.8 (1.1-2.7)</b>       | <b>2.0 (1.7-2.4)</b>      |
|                                                     |                                            |                            |                           |
| <b>Single</b>                                       |                                            |                            |                           |
| - male                                              | 1.0 (0.9-1.1)                              | n/a                        | 1.0 (0.9-1.0)             |
| - female                                            | 1.0 (0.8-1.2)                              | n/a                        | 0.9 (0.8-1.1)             |
|                                                     |                                            |                            |                           |
| <b>PARENTAL FACTORS BEFORE DIAGNOSIS/MATCHING</b>   |                                            |                            |                           |
| <b>Alcohol or drug use disorders</b>                |                                            |                            |                           |
| - male                                              | <b>1.8 (1.5-2.1)</b>                       | <b>1.6 (1.1-2.4)</b>       | <b>2.5 (2.3-2.7)</b>      |
| - female                                            | <b>1.9 (1.4-2.7)</b>                       | <b>3.1 (1.5-6.2)</b>       | <b>3.1 (2.4-4.0)</b>      |
|                                                     |                                            |                            |                           |
| <b>Any offence</b>                                  |                                            |                            |                           |
| - male                                              | <b>1.3 (1.1-1.6)</b>                       | <b>1.4 (1.1-1.9)</b>       | <b>1.7 (1.6-1.9)</b>      |
| - female                                            | <b>1.5 (1.1-2.0)</b>                       | 1.7 (0.9-3.3)              | <b>2.2 (1.7-2.9)</b>      |
|                                                     |                                            |                            |                           |
| <b>Violent offence</b>                              |                                            |                            |                           |
| - male                                              | <b>2.1 (1.8-2.6)</b>                       | <b>2.7 (1.9-3.8)</b>       | <b>3.5 (3.1-3.9)</b>      |
| - female                                            | <b>2.0 (1.3-3.1)</b>                       | <b>3.9 (1.9-8.1)</b>       | <b>4.7 (3.4-6.5)</b>      |
|                                                     |                                            |                            |                           |
| <b>Suicide</b>                                      |                                            |                            |                           |
| - male                                              | 1.3 (1.0-1.7)                              | <b>1.9 (1.3-2.8)</b>       | <b>1.7 (1.4-2.0)</b>      |
| - female                                            | 1.6 (1.0-2.6)                              | 2.0 (0.7-5.3)              | <b>1.8 (1.1-3.1)</b>      |
|                                                     |                                            |                            |                           |
| <b>Psychiatric diagnosis</b>                        |                                            |                            |                           |
| - male                                              | 1.1 (1.0-1.3)                              | 1.2 (0.9-1.6)              | <b>1.6 (1.5-1.8)</b>      |
| - female                                            | <b>1.4 (1.1-1.9)</b>                       | <b>2.0 (1.2-3.5)</b>       | <b>2.0 (1.5-2.6)</b>      |
|                                                     |                                            |                            |                           |
| <b>Born abroad</b>                                  |                                            |                            |                           |
| - male                                              | <b>1.4 (1.3-1.6)</b>                       | <b>2.3 (2.0-2.6)</b>       | <b>2.2 (2.0-2.3)</b>      |
| - female                                            | <b>1.3 (1.0-1.7)</b>                       | <b>2.0 (1.4-2.9)</b>       | <b>1.8 (1.4-2.3)</b>      |
|                                                     |                                            |                            |                           |
| <b>INDIVIDUAL FACTORS BEFORE DIAGNOSIS/MATCHING</b> |                                            |                            |                           |
| <b>Alcohol use disorders</b>                        |                                            |                            |                           |
| - male                                              | <b>2.6 (2.3-2.9)</b>                       | <b>7.4 (5.9-9.3)</b>       | <b>9.0 (8.2-9.9)</b>      |
| - female                                            | <b>4.5 (3.4-6.0)</b>                       | <b>21.3 (12.7-35.6)</b>    | <b>19.8 (14.6-26.7)</b>   |

|                                   |                      |                         |                         |
|-----------------------------------|----------------------|-------------------------|-------------------------|
|                                   |                      |                         |                         |
| <b>Drug use disorders</b>         |                      |                         |                         |
| - male                            | <b>3.1 (2.8-3.5)</b> | <b>10.4 (8.1-13.4)</b>  | <b>16.2 (14.6-17.9)</b> |
| - female                          | <b>5.1 (4.1-6.5)</b> | <b>23.4 (13.4-41.1)</b> | <b>36.0 (27.0-48.0)</b> |
|                                   |                      |                         |                         |
| <b>Alcohol offence</b>            |                      |                         |                         |
| - male                            | <b>2.8 (2.5-3.0)</b> | <b>5.2 (4.5-6.1)</b>    | <b>16.7 (15.6-17.9)</b> |
| - female                          | <b>4.7 (3.3-6.7)</b> | <b>10.7 (5.6-20.5)</b>  | <b>39.5 (27.4-56.8)</b> |
|                                   |                      |                         |                         |
| <b>Drug offence</b>               |                      |                         |                         |
| - male                            | <b>3.8 (3.5-4.1)</b> | <b>8.7 (7.4-10.2)</b>   | <b>19.4 (18.1-20.8)</b> |
| - female                          | <b>6.2 (4.8-8.0)</b> | <b>28.6 (18.2-45.1)</b> | <b>51.6 (39.6-67.2)</b> |
|                                   |                      |                         |                         |
| <b>Alcohol or drug medication</b> |                      |                         |                         |
| - male                            | 1.2 (0.7-2.1)        | 3.7 (0.5-26.2)          | <b>11.2 (7.1-17.9)</b>  |
| - female                          | 1.2 (0.2-8.8)        | ---                     | ---                     |
|                                   |                      |                         |                         |
| <b>Any offence</b>                |                      |                         |                         |
| - male                            | <b>3.8 (3.5-4.1)</b> | <b>6.7 (5.8-7.7)</b>    | <b>7.0 (6.7-7.3)</b>    |
| - female                          | <b>5.0 (4.2-6.0)</b> | <b>12.7 (9.0-17.8)</b>  | <b>13.9 (11.9-16.2)</b> |
|                                   |                      |                         |                         |
| <b>Violent offence</b>            |                      |                         |                         |
| - male                            | <b>4.3 (4.0-4.7)</b> | <b>9.9 (8.6-11.4)</b>   | <b>11.6 (11.1-12.2)</b> |
| - female                          | <b>7.7 (6.2-9.6)</b> | <b>24.5 (15.5-38.6)</b> | <b>33.8 (27.0-42.2)</b> |
|                                   |                      |                         |                         |
| <b>Non-violent offence</b>        |                      |                         |                         |
| - male                            | <b>3.5 (3.2-3.8)</b> | <b>6.1 (5.3-7.0)</b>    | <b>6.5 (6.3-6.8)</b>    |
| - female                          | <b>4.9 (4.1-5.8)</b> | <b>12.2 (8.7-17.2)</b>  | <b>12.8 (11.0-15.0)</b> |
|                                   |                      |                         |                         |
| <b>Self-harm</b>                  |                      |                         |                         |
| - male                            | <b>1.8 (1.6-2.1)</b> | <b>5.8 (4.3-7.6)</b>    | <b>5.7 (5.2-6.4)</b>    |
| - female                          | <b>1.5 (1.2-1.9)</b> | <b>10.2 (6.8-15.5)</b>  | <b>8.5 (6.6-10.9)</b>   |
|                                   |                      |                         |                         |
| <b>IQ (men only)</b>              |                      |                         |                         |
| high (7-9)                        | <b>1.0 (ref)</b>     | <b>1.0 (ref)</b>        | <b>1.0 (ref)</b>        |
| medium (4-6)                      | <b>1.4 (1.2-1.8)</b> | <b>2.3 (1.7-3.1)</b>    | <b>2.9 (2.6-3.3)</b>    |
| low (1-3)                         | <b>1.8 (1.5-2.2)</b> | <b>5.2 (3.8-7.0)</b>    | <b>7.6 (6.8-8.4)</b>    |
|                                   |                      |                         |                         |
| <b>Birth complications</b>        |                      |                         |                         |
| - male                            | 1.0 (0.7-1.3)        | <b>1.7 (1.0-2.8)</b>    | 1.0 (0.8-1.2)           |
| - female                          | 0.6 (0.3-1.6)        | 2.8 (0.9-8.3)           | 1.1 (0.6-2.1)           |

Hazard ratios (HR) and 95% confidence intervals (CI) significant to  $p < 0.05$  level are in **bold**. Adjusted for age at diagnosis.

**Appendix table 4: Risk factors for suicide in patients with schizophrenia and related disorders, unaffected siblings, and general population controls**

|                                                     | Schizophrenia and related disorders | Unaffected siblings   | General population     |
|-----------------------------------------------------|-------------------------------------|-----------------------|------------------------|
|                                                     | HR (95% CI)                         | HR (95% CI)           | HR (95% CI)            |
| <b>SOCIOECONOMIC FACTORS</b>                        |                                     |                       |                        |
| <b>Sex</b>                                          |                                     |                       |                        |
| - male                                              | <b>1.5 (1.3-1.8)</b>                | <b>2.1 (1.5-2.9)</b>  | <b>2.8 (2.3-3.3)</b>   |
|                                                     |                                     |                       |                        |
| <b>Low income</b>                                   |                                     |                       |                        |
| - male                                              | 1.0 (0.9-1.2)                       | <b>1.7 (1.2-2.5)</b>  | <b>1.4 (1.2-1.6)</b>   |
| - female                                            | 1.3 (1.0-1.7)                       | 1.3 (0.8-2.3)         | <b>1.6 (1.1-2.1)</b>   |
|                                                     |                                     |                       |                        |
| <b>Born abroad</b>                                  |                                     |                       |                        |
| - male                                              | <b>0.8 (0.6-0.9)</b>                | 0.5 (0.2-1.1)         | <b>0.6 (0.4-0.8)</b>   |
| - female                                            | 0.8 (0.6-1.1)                       | 0.4 (0.1-1.4)         | 1.2 (0.8-1.9)          |
|                                                     |                                     |                       |                        |
| <b>single</b>                                       |                                     |                       |                        |
| - male                                              | <b>0.5 (0.4-0.6)</b>                | n/a                   | 1.0 (0.8-1.1)          |
| - female                                            | <b>0.6 (0.5-0.8)</b>                | n/a                   | 1.0 (0.7-1.3)          |
|                                                     |                                     |                       |                        |
| <b>PARENTAL FACTORS BEFORE DIAGNOSIS/MATCHING</b>   |                                     |                       |                        |
| <b>Alcohol or drug use disorders</b>                |                                     |                       |                        |
| - male                                              | 1.2 (0.9-1.7)                       | 2.1 (0.9-5.3)         | <b>2.4 (1.8-3.2)</b>   |
| - female                                            | 1.2 (0.7-2.1)                       | 0.9 (0.1-6.3)         | <b>3.9 (2.4-6.4)</b>   |
|                                                     |                                     |                       |                        |
| <b>Any offence</b>                                  |                                     |                       |                        |
| - male                                              | 0.8 (0.6-1.2)                       | 1.2 (0.5-2.8)         | <b>1.6 (1.2-2.1)</b>   |
| - female                                            | 1.0 (0.6-1.7)                       | 1.3 (0.4-4.3)         | <b>2.0 (1.2-3.6)</b>   |
|                                                     |                                     |                       |                        |
| <b>Violent offence</b>                              |                                     |                       |                        |
| - male                                              | <b>0.4 (0.2-0.9)</b>                | 1.1 (0.3-4.5)         | <b>2.2 (1.3-3.5)</b>   |
| - female                                            | 0.6 (0.2-1.6)                       | ---                   | <b>3.0 (1.2-7.4)</b>   |
|                                                     |                                     |                       |                        |
| <b>Suicide</b>                                      |                                     |                       |                        |
| - male                                              | <b>1.8 (1.1-2.7)</b>                | 2.4 (1.0-5.9)         | <b>2.5 (1.6-3.9)</b>   |
| - female                                            | <b>1.9 (1.0-3.6)</b>                | 2.2 (0.5-8.9)         | <b>3.1 (1.4-7.1)</b>   |
|                                                     |                                     |                       |                        |
| <b>Psychiatric diagnosis</b>                        |                                     |                       |                        |
| - male                                              | 1.0 (0.7-1.3)                       | 1.5 (0.8-2.9)         | <b>2.4 (1.8-3.1)</b>   |
| - female                                            | 1.4 (1.0-2.1)                       | ---                   | <b>2.1 (1.2-3.7)</b>   |
|                                                     |                                     |                       |                        |
| <b>Born abroad</b>                                  |                                     |                       |                        |
| - male                                              | 1.0 (0.8-1.3)                       | 1.2 (0.7-1.9)         | 1.3 (0.9-1.7)          |
| - female                                            | 0.7 (0.5-1.1)                       | 1.1 (0.6-2.2)         | <b>2.0 (1.2-3.3)</b>   |
|                                                     |                                     |                       |                        |
| <b>INDIVIDUAL FACTORS BEFORE DIAGNOSIS/MATCHING</b> |                                     |                       |                        |
| <b>Alcohol use disorders</b>                        |                                     |                       |                        |
| - male                                              | <b>1.5 (1.2-2.1)</b>                | <b>9.1 (5.4-15.2)</b> | <b>8.1 (5.8-11.4)</b>  |
| - female                                            | <b>2.3 (1.4-3.8)</b>                | <b>8.0 (2.5-25.7)</b> | <b>15.9 (7.8-32.5)</b> |

|                                   |                       |                         |                          |
|-----------------------------------|-----------------------|-------------------------|--------------------------|
|                                   |                       |                         |                          |
| <b>Drug use disorders</b>         |                       |                         |                          |
| - male                            | <b>1.7 (1.3-2.1)</b>  | <b>20.3 (12.7-32.4)</b> | <b>17.3 (12.6-23.7)</b>  |
| - female                          | <b>1.8 (1.2-2.8)</b>  | 3.3 (0.5-24.1)          | <b>24.0 (12.2-47.3)</b>  |
|                                   |                       |                         |                          |
| <b>Alcohol offence</b>            |                       |                         |                          |
| - male                            | <b>1.5 (1.2-1.9)</b>  | <b>3.6 (2.4-5.4)</b>    | <b>10.5 (8.2-13.4)</b>   |
| - female                          | 1.4 (0.6-3.2)         | 2.0 (0.3-14.4)          | <b>8.4 (2.1-33.9)</b>    |
|                                   |                       |                         |                          |
| <b>Drug offence</b>               |                       |                         |                          |
| - male                            | <b>1.3 (1.0-1.6)</b>  | <b>8.3 (5.6-12.4)</b>   | <b>11.5 (8.9-14.8)</b>   |
| - female                          | 1.6 (0.9-2.8)         | <b>5.6 (1.7-18.0)</b>   | <b>25.6 (13.0-50.2)</b>  |
|                                   |                       |                         |                          |
| <b>Alcohol or drug medication</b> |                       |                         |                          |
| - male                            | 1.3 (0.4-4.2)         | 32.1 (4.3-241.5)        | <b>8.4 (1.2-60.1)</b>    |
| - female                          | <b>7.7 (2.4-24.4)</b> | ---                     | <b>80.9 (10.9-598.4)</b> |
|                                   |                       |                         |                          |
| <b>Any offence</b>                |                       |                         |                          |
| - male                            | <b>1.5 (1.3-1.8)</b>  | <b>3.1 (2.2-4.5)</b>    | <b>3.6 (3.1-4.2)</b>     |
| - female                          | <b>1.6 (1.1-2.1)</b>  | <b>2.3 (1.1-4.9)</b>    | <b>4.6 (3.1-6.9)</b>     |
|                                   |                       |                         |                          |
| <b>Violent offence</b>            |                       |                         |                          |
| - male                            | <b>1.5 (1.2-1.8)</b>  | <b>3.8 (2.6-5.8)</b>    | <b>4.2 (3.4-5.1)</b>     |
| - female                          | 1.2 (0.7-2.1)         | 1.9 (0.3-13.4)          | <b>10.9 (5.4-22.3)</b>   |
|                                   |                       |                         |                          |
| <b>Non-violent offence</b>        |                       |                         |                          |
| - male                            | <b>1.5 (1.3-1.8)</b>  | <b>3.4 (2.4-4.9)</b>    | <b>3.8 (3.3-4.5)</b>     |
| - female                          | <b>1.5 (1.1-2.1)</b>  | <b>2.5 (1.2-5.2)</b>    | <b>4.4 (2.9-6.7)</b>     |
|                                   |                       |                         |                          |
| <b>Self-harm</b>                  |                       |                         |                          |
| - male                            | <b>2.2 (1.8-2.7)</b>  | <b>9.3 (5.3-16.5)</b>   | <b>7.1 (5.2-9.8)</b>     |
| - female                          | <b>2.3 (1.7-3.0)</b>  | <b>9.7 (5.1-18.5)</b>   | <b>13.4 (8.7-20.7)</b>   |
|                                   |                       |                         |                          |
| <b>IQ (men only)</b>              |                       |                         |                          |
| high (7-9)                        | 1.0 (ref)             | <b>1.0 (ref)</b>        | <b>1.0 (ref)</b>         |
| medium (4-6)                      | 0.9 (0.7-1.2)         | 1.2 (0.7-2.3)           | <b>1.5 (1.1-1.9)</b>     |
| low (1-3)                         | 0.8 (0.6-1.0)         | <b>2.0 (1.1-3.8)</b>    | <b>2.6 (2.0-3.4)</b>     |
|                                   |                       |                         |                          |
| <b>Birth complications</b>        |                       |                         |                          |
| - male                            | 1.2 (0.7-2.2)         | 3.2 (0.9-11.8)          | 1.3 (0.7-2.5)            |
| - female                          | 1.4 (0.6-3.2)         | ---                     | ---                      |

Hazard ratios (HR) and 95% confidence intervals (CI) significant to p<0.05 level are in **bold**. Adjusted for age at diagnosis.

**Appendix table 5: Risk factors for premature mortality in patients with schizophrenia and related disorders, unaffected siblings, and general population controls**

|                                                     | <b>Schizophrenia and related disorders</b> | <b>Unaffected siblings</b> | <b>General population</b> |
|-----------------------------------------------------|--------------------------------------------|----------------------------|---------------------------|
|                                                     | <b>HR (95% CI)</b>                         | <b>HR (95% CI)</b>         | <b>HR (95% CI)</b>        |
| <b>SOCIOECONOMIC FACTORS</b>                        |                                            |                            |                           |
| <b>Sex</b>                                          |                                            |                            |                           |
| - male                                              | <b>1.6 (1.4-1.8)</b>                       | <b>2.0 (1.7-2.4)</b>       | <b>1.7 (1.6-1.8)</b>      |
|                                                     |                                            |                            |                           |
| <b>Low income</b>                                   |                                            |                            |                           |
| - male                                              | 1.1 (1.0-1.2)                              | <b>1.3 (1.1-1.6)</b>       | <b>1.3 (1.2-1.4)</b>      |
| - female                                            | <b>1.3 (1.1-1.5)</b>                       | 1.2 (0.9-1.6)              | <b>1.2 (1.1-1.3)</b>      |
|                                                     |                                            |                            |                           |
| <b>Born abroad</b>                                  |                                            |                            |                           |
| - male                                              | <b>0.9 (0.7-1.0)</b>                       | 1.1 (0.8-1.5)              | 1.1 (0.9-1.2)             |
| - female                                            | 0.8 (0.6-1.0)                              | 0.7 (0.4-1.2)              | <b>1.3 (1.1-1.5)</b>      |
|                                                     |                                            |                            |                           |
| <b>single</b>                                       |                                            |                            |                           |
| - male                                              | <b>0.6 (0.6-0.7)</b>                       | n/a                        | 0.9 (0.9-1.0)             |
| - female                                            | <b>0.7 (0.6-0.9)</b>                       | n/a                        | 1.1 (1.0-1.2)             |
|                                                     |                                            |                            |                           |
| <b>PARENTAL FACTORS BEFORE DIAGNOSIS/MATCHING</b>   |                                            |                            |                           |
| <b>Alcohol or drug use disorders</b>                |                                            |                            |                           |
| - male                                              | 1.3 (1.0-1.6)                              | 1.5 (0.8-2.7)              | <b>1.9 (1.6-2.2)</b>      |
| - female                                            | 1.3 (0.8-1.9)                              | 1.4 (0.6-3.3)              | <b>1.4 (1.0-1.8)</b>      |
|                                                     |                                            |                            |                           |
| <b>Any offence</b>                                  |                                            |                            |                           |
| - male                                              | 0.9 (0.7-1.2)                              | 1.1 (0.6-1.7)              | <b>1.4 (1.2-1.7)</b>      |
| - female                                            | 1.1 (0.8-1.6)                              | 1.0 (0.5-2.1)              | 1.2 (0.9-1.6)             |
|                                                     |                                            |                            |                           |
| <b>Violent offence</b>                              |                                            |                            |                           |
| - male                                              | <b>0.4 (0.2-0.7)</b>                       | 1.4 (0.7-3.1)              | <b>2.1 (1.6-2.6)</b>      |
| - female                                            | 0.6 (0.3-1.3)                              | 0.5 (0.1-3.3)              | 1.1 (0.6-1.9)             |
|                                                     |                                            |                            |                           |
| <b>Suicide</b>                                      |                                            |                            |                           |
| - male                                              | 1.4 (1.0-2.0)                              | <b>1.5 (0.8-2.7)</b>       | <b>1.7 (1.3-2.2)</b>      |
| - female                                            | <b>1.7 (1.0-2.8)</b>                       | 0.9 (0.3-2.8)              | 1.2 (0.8-1.9)             |
|                                                     |                                            |                            |                           |
| <b>Psychiatric diagnosis</b>                        |                                            |                            |                           |
| - male                                              | 1.0 (0.8-1.3)                              | 1.6 (1.1-2.3)              | <b>1.6 (1.4-1.9)</b>      |
| - female                                            | 1.3 (0.9-1.7)                              | 0.7 (0.3-1.5)              | 1.0 (0.7-1.3)             |
|                                                     |                                            |                            |                           |
| <b>Born abroad</b>                                  |                                            |                            |                           |
| - male                                              | 1.1 (0.9-1.3)                              | <b>1.4 (1.1-1.8)</b>       | <b>1.4 (1.3-1.7)</b>      |
| - female                                            | 0.9 (0.7-1.3)                              | 0.9 (0.6-1.4)              | <b>1.4 (1.1-1.8)</b>      |
|                                                     |                                            |                            |                           |
| <b>INDIVIDUAL FACTORS BEFORE DIAGNOSIS/MATCHING</b> |                                            |                            |                           |
| <b>Alcohol use disorders</b>                        |                                            |                            |                           |
| - male                                              | <b>1.9 (1.6-2.4)</b>                       | <b>6.4 (4.7-8.6)</b>       | <b>7.7 (6.6-9.1)</b>      |
| - female                                            | <b>2.4 (1.7-3.4)</b>                       | <b>8.6 (4.5-16.3)</b>      | <b>9.9 (7.1-13.7)</b>     |



|                                   |                       |                        |                         |
|-----------------------------------|-----------------------|------------------------|-------------------------|
|                                   |                       |                        |                         |
| <b>Drug use disorders</b>         |                       |                        |                         |
| - male                            | <b>1.9 (1.6-2.3)</b>  | <b>11.8 (8.7-16.0)</b> | <b>13.9 (11.8-16.4)</b> |
| - female                          | <b>2.5 (1.9-3.4)</b>  | <b>4.1 (1.5-11.1)</b>  | <b>9.9 (6.9-14.2)</b>   |
|                                   |                       |                        |                         |
| <b>Alcohol offence</b>            |                       |                        |                         |
| - male                            | <b>1.7 (1.5-2.0)</b>  | <b>3.1 (2.5-3.9)</b>   | <b>8.2 (7.2-9.3)</b>    |
| - female                          | 1.6 (0.9-2.8)         | 2.4 (0.9-6.4)          | <b>6.4 (3.7-11.1)</b>   |
|                                   |                       |                        |                         |
| <b>Drug offence</b>               |                       |                        |                         |
| - male                            | <b>1.8 (1.5-2.0)</b>  | <b>5.4 (4.3-6.9)</b>   | <b>10.9 (9.6-12.3)</b>  |
| - female                          | <b>2.1 (1.5-3.1)</b>  | <b>4.1 (2.0-8.4)</b>   | <b>10.9 (7.6-15.5)</b>  |
|                                   |                       |                        |                         |
| <b>Alcohol or drug medication</b> |                       |                        |                         |
| - male                            | 0.8 (0.3-2.4)         | 7.7 (1.1-56.0)         | <b>6.4 (2.4-17.2)</b>   |
| - female                          | <b>4.5 (1.4-14.2)</b> | ---                    | <b>14.7 (3.6-59.0)</b>  |
|                                   |                       |                        |                         |
| <b>Any offence</b>                |                       |                        |                         |
| - male                            | <b>1.7 (1.5-1.9)</b>  | <b>2.6 (2.2-3.2)</b>   | <b>2.9 (2.7-3.1)</b>    |
| - female                          | <b>1.7 (1.3-2.1)</b>  | <b>3.1 (2.1-4.5)</b>   | <b>2.7 (2.2-3.2)</b>    |
|                                   |                       |                        |                         |
| <b>Violent offence</b>            |                       |                        |                         |
| - male                            | <b>1.6 (1.4-1.8)</b>  | <b>3.8 (3.0-4.7)</b>   | <b>3.9 (3.6-4.3)</b>    |
| - female                          | <b>1.8 (1.3-2.6)</b>  | <b>4.8 (2.3-9.7)</b>   | <b>4.2 (2.8-6.3)</b>    |
|                                   |                       |                        |                         |
| <b>Non-violent offence</b>        |                       |                        |                         |
| - male                            | <b>1.7 (1.5-1.9)</b>  | <b>2.7 (2.3-3.3)</b>   | <b>3.0 (2.8-3.2)</b>    |
| - female                          | <b>1.7 (1.3-2.1)</b>  | <b>2.9 (1.9-4.3)</b>   | <b>2.7 (2.3-3.3)</b>    |
|                                   |                       |                        |                         |
| <b>Self-harm</b>                  |                       |                        |                         |
| - male                            | <b>1.9 (1.6-2.2)</b>  | <b>5.5 (3.8-7.9)</b>   | <b>4.2 (3.4-5.0)</b>    |
| - female                          | <b>2.1 (1.7-2.6)</b>  | <b>5.3 (3.4-8.1)</b>   | <b>4.3 (3.3-5.5)</b>    |
|                                   |                       |                        |                         |
| <b>IQ (men only)</b>              |                       |                        |                         |
| high (7-9)                        | 1.0 (ref)             | <b>1.0 (ref)</b>       | <b>1.0 (ref)</b>        |
| medium (4-6)                      | 1.1 (0.8-1.3)         | 1.4 (1.0-2.1)          | <b>1.4 (1.2-1.6)</b>    |
| low (1-3)                         | 1.0 (0.8-1.2)         | <b>2.4 (1.7-3.5)</b>   | <b>2.3 (2.0-2.7)</b>    |
|                                   |                       |                        |                         |
| <b>Birth complications</b>        |                       |                        |                         |
| - male                            | <b>1.9 (1.2-2.9)</b>  | <b>6.1 (3.0-12.6)</b>  | 1.2 (0.8-1.7)           |
| - female                          | 1.3 (0.6-2.8)         | ---                    | 1.0 (0.5-2.1)           |

Hazard ratios (HR) and 95% confidence intervals (CI) significant to p<0.05 level are in **bold**. Adjusted for age at diagnosis.

**Appendix table 6: Adjusted odds ratios of adverse outcomes in patients with schizophrenia and related disorders compared with general population controls, by age group.**

| Age at diagnosis | Violent offence<br>aOR (95% CI) | Suicide<br>aOR (95% CI) | Premature mortality<br>aOR (95% CI) |
|------------------|---------------------------------|-------------------------|-------------------------------------|
| <25 (n=7,965)    | 5.9 (5.5-6.3)                   | 19.8 (16.9-23.1)        | 8.1 (7.2-9.0)                       |
| 25-34 (n=10,155) | 8.7 (8.1-9.3)                   | 22.2 (19.2-25.8)        | 8.9 (8.1-9.8)                       |
| 35-44 (n=5153)   | 9.4 (8.2-10.7)                  | 19.0 (14.2-25.4)        | 6.5 (5.6-7.6)                       |
| 45-54 (n=1,024)  | 6.0 (3.6-10.1)                  | 13.8 (3.9-49.5)         | 4.4 (2.7-7.3)                       |

General population controls are matched by age and sex. aOR = odds ratios, adjusted for low family income and being born abroad.

**Appendix table 7: Adjusted odds ratios of adverse outcomes in patients with schizophrenia and related disorders compared with general population controls, by year of diagnosis**

|                     | First diagnosis<br>before 2001<br>aOR (95% CI) | First diagnosis in<br>or after 2001<br>aOR (95% CI) | Statistical<br>difference<br>between aORs |
|---------------------|------------------------------------------------|-----------------------------------------------------|-------------------------------------------|
| Violence            | 7.3 (6.9-7.7)                                  | 7.9 (7.3-8.7)                                       | p=0.115                                   |
| Suicide             | 20.2 (18.0-22.6)                               | 23.2 (18.5-29.2)                                    | p=0.275                                   |
| Premature mortality | 8.2 (7.7-8.8)                                  | 7.6 (6.6-8.7)                                       | p=0.210                                   |

General population controls are matched by age and sex. aOR = odds ratios, adjusted for low family income and being born abroad.

**Appendix table 8: Adjusted odds ratios of adverse outcomes in patients with schizophrenia and related disorders compared with general population controls, by diagnostic group (ICD-9 and ICD-10 only)**

|                     | Schizophrenia<br>aOR (95% CI) | Other non-<br>affective psychoses<br>aOR (95% CI) | Statistical<br>difference<br>between aORs |
|---------------------|-------------------------------|---------------------------------------------------|-------------------------------------------|
| Violence            | 7.1 (6.7-7.6)                 | 7.7 (7.2-8.2)                                     | p=0.083                                   |
| Suicide             | 21.3 (17.8-25.5)              | 22.0 (19.2-25.2)                                  | p=0.776                                   |
| Premature mortality | 8.3 (7.4-9.3)                 | 8.2 (7.5-8.9)                                     | p=0.858                                   |

General population controls are matched by age and sex. aOR = odds ratios, adjusted for low family income and being born abroad.

**Appendix table 9: Effects of year of diagnosis and annual inpatient nights on ratio of odds ratios of adverse outcomes**

| <b>% increases in ratio of odds ratios, by calendar year</b>                             |                          |                                 |
|------------------------------------------------------------------------------------------|--------------------------|---------------------------------|
|                                                                                          | Unadjusted (as in paper) | Substance abuse <u>adjusted</u> |
| Violence                                                                                 | 1.1% (0.1% to 2.2%)      | 1.0% (-0.2% to 2.1%)            |
| Suicide                                                                                  | 1.7% (-0.9% to 4.3%)     | 1.7% (-1.0 to 4.4%)             |
| Premature mortality                                                                      | 0.2% (-1.3% to 1.6%)     | 0.3% (-1.2% to 1.8%)            |
| <b>% increases in ratio of odds ratios, by 1,000,000 fewer inpatient nights per year</b> |                          |                                 |
|                                                                                          | Unadjusted (as in paper) | Substance abuse <u>adjusted</u> |
| Violence                                                                                 | 5.6% (2.6% to 8.4%)      | 5.0% (1.9% to 7.9%)             |
| Suicide                                                                                  | 5.5% (-1.3% to 11.8%)    | 5.6% (-1.4% to 12.1%)           |
| Premature mortality                                                                      | 3.4% (-0.6% to 7.2%)     | 3.6% (-0.4 to 7.5%)             |

The ratio of odds ratios measures changes in rates of adverse outcomes in patients with schizophrenia and related disorders compared with unaffected siblings.
